# Supplementary material for: Synthesis, Structure, and Luminescence of a Molecular Europium Tetracyanoplatinate Incorporating 4,5-Diazafluoren-9-One
Source: MDPI journal article supplement (doi:10.3390/cryst13020317), 2023-02-14

Supporting Information for:

**Synthesis, structure, and luminescence of a molecular Europium tetracyanoplatinate incorporating 4,5-diazafluoren-9-one**

Richard E. Sykora

Table S1. Crystal data and structure refinement for  $[(\text{Eu}(\text{H}_2\text{O})_6)_2(\text{Pt}(\text{CN})_4)_3] \cdot 4\text{C}_{11}\text{H}_6\text{N}_2\text{O} \cdot 4\text{H}_2\text{O}$ .

|                                   |                                                                                   |                             |
|-----------------------------------|-----------------------------------------------------------------------------------|-----------------------------|
| Identification code               | xc197                                                                             |                             |
| Empirical formula                 | $\text{C}_{56} \text{H}_{60} \text{Eu}_2 \text{N}_{20} \text{O}_{22} \text{Pt}_3$ |                             |
| Formula weight                    | 2254.43                                                                           |                             |
| Temperature                       | 290(2) K                                                                          |                             |
| Wavelength                        | 0.71073 Å                                                                         |                             |
| Crystal system                    | Monoclinic                                                                        |                             |
| Space group                       | P 21/n                                                                            |                             |
| Unit cell dimensions              | $a = 10.9678(3)$ Å                                                                | $\alpha = 90^\circ$ .       |
|                                   | $b = 25.1612(6)$ Å                                                                | $\beta = 91.400(2)^\circ$ . |
|                                   | $c = 13.3381(3)$ Å                                                                | $\gamma = 90^\circ$ .       |
| Volume                            | $3679.72(16)$ Å <sup>3</sup>                                                      |                             |
| Z                                 | 2                                                                                 |                             |
| Density (calculated)              | 2.035 Mg/m <sup>3</sup>                                                           |                             |
| Absorption coefficient            | 7.446 mm <sup>-1</sup>                                                            |                             |
| F(000)                            | 2144                                                                              |                             |
| Crystal size                      | 0.15 x 0.07 x 0.05 mm <sup>3</sup>                                                |                             |
| Theta range for data collection   | 3.06 to 25.35°.                                                                   |                             |
| Index ranges                      | $-13 \leq h \leq 13, -30 \leq k \leq 30, -15 \leq l \leq 16$                      |                             |
| Reflections collected             | 27552                                                                             |                             |
| Independent reflections           | 6722 [R(int) = 0.0414]                                                            |                             |
| Completeness to theta = 25.35°    | 99.8 %                                                                            |                             |
| Absorption correction             | Semi-empirical from equivalents                                                   |                             |
| Max. and min. transmission        | 1.00 and 0.67827                                                                  |                             |
| Refinement method                 | Full-matrix least-squares on F <sup>2</sup>                                       |                             |
| Data / restraints / parameters    | 6722 / 0 / 466                                                                    |                             |
| Goodness-of-fit on F <sup>2</sup> | 0.855                                                                             |                             |

Final R indices [ $I > 2\sigma(I)$ ]

R1 = 0.0261, wR2 = 0.0455

R indices (all data)

R1 = 0.0461, wR2 = 0.0476

Largest diff. peak and hole

1.241 and -1.257 e.Å<sup>-3</sup>

Table S2. Atomic coordinates ( $\times 10^4$ ) and equivalent isotropic displacement parameters ( $\text{\AA}^2 \times 10^3$ ) for  $[(\text{Eu}(\text{H}_2\text{O})_6)_2(\text{Pt}(\text{CN})_4)_3] \cdot 4\text{C}_{11}\text{H}_6\text{N}_2\text{O} \cdot 4\text{H}_2\text{O}$ .  $U(\text{eq})$  is defined as one third of the trace of the orthogonalized  $U^{ij}$  tensor.

|       | x       | y       | z        | $U(\text{eq})$ |
|-------|---------|---------|----------|----------------|
| Eu(1) | 1332(1) | 1433(1) | 1082(1)  | 27(1)          |
| Pt(1) | 5000    | 0       | 0        | 59(1)          |
| Pt(2) | 1343(1) | 1693(1) | -3122(1) | 34(1)          |
| C(1)  | 1330(4) | 1593(2) | -1642(4) | 33(1)          |
| C(2)  | 2070(5) | 2414(2) | -2967(4) | 42(1)          |
| C(3)  | 1302(4) | 1789(2) | -4616(4) | 44(1)          |
| C(4)  | 719(5)  | 956(3)  | -3331(4) | 46(1)          |
| C(5)  | 3754(5) | 518(2)  | 444(4)   | 53(2)          |
| C(6)  | 3712(7) | -376(3) | -862(5)  | 65(2)          |
| C(7)  | -318(5) | 3287(3) | -1359(4) | 60(2)          |
| C(8)  | -621(6) | 3794(3) | -1684(5) | 78(2)          |
| C(9)  | -838(6) | 4187(3) | -1007(6) | 83(2)          |
| C(10) | -768(5) | 4049(2) | -16(5)   | 57(2)          |
| C(11) | -452(4) | 3534(2) | 251(4)   | 42(1)          |
| C(12) | -938(6) | 4362(3) | 922(6)   | 73(2)          |
| C(13) | -418(4) | 3502(2) | 1370(4)  | 38(1)          |
| C(14) | -714(5) | 3995(2) | 1770(5)  | 50(2)          |
| C(15) | -742(6) | 4054(3) | 2783(5)  | 71(2)          |
| C(16) | -464(5) | 3620(3) | 3360(5)  | 63(2)          |
| C(17) | -183(5) | 3150(2) | 2922(4)  | 51(2)          |
| C(18) | 2791(5) | 3203(3) | -373(4)  | 56(2)          |
| C(19) | 2609(5) | 3721(3) | -671(4)  | 62(2)          |
| C(20) | 2514(5) | 4117(2) | 22(5)    | 56(2)          |
| C(21) | 2602(4) | 3966(2) | 1009(4)  | 39(1)          |
| C(22) | 2784(4) | 3436(2) | 1255(4)  | 34(1)          |
| C(23) | 2570(4) | 4284(2) | 1950(4)  | 44(1)          |
| C(24) | 2850(4) | 3382(2) | 2357(4)  | 36(1)          |
| C(25) | 2762(4) | 3886(2) | 2773(4)  | 38(1)          |
| C(26) | 2810(5) | 3949(2) | 3794(4)  | 51(2)          |
| C(27) | 2945(5) | 3488(2) | 4354(4)  | 54(2)          |

|       |          |         |          |        |
|-------|----------|---------|----------|--------|
| C(28) | 2992(5)  | 3003(2) | 3888(4)  | 51(2)  |
| N(1)  | 1303(4)  | 1540(2) | -791(3)  | 41(1)  |
| N(2)  | 2511(4)  | 2820(2) | -2899(3) | 56(1)  |
| N(3)  | 1261(5)  | 1834(2) | -5454(4) | 85(2)  |
| N(4)  | 416(5)   | 527(2)  | -3495(4) | 69(2)  |
| N(5)  | 3049(4)  | 821(2)  | 676(3)   | 51(1)  |
| N(6)  | 3006(7)  | -587(3) | -1313(5) | 93(2)  |
| N(7)  | -240(4)  | 3143(2) | -394(3)  | 45(1)  |
| N(8)  | -133(3)  | 3080(2) | 1916(3)  | 39(1)  |
| N(9)  | 2871(4)  | 3046(2) | 589(3)   | 42(1)  |
| N(10) | 2950(4)  | 2937(2) | 2887(3)  | 41(1)  |
| O(1)  | 1649(3)  | 1949(1) | 2567(2)  | 49(1)  |
| O(2)  | 1556(3)  | 770(1)  | 2379(2)  | 47(1)  |
| O(3)  | 3080(3)  | 1972(1) | 854(3)   | 46(1)  |
| O(4)  | -648(3)  | 1373(1) | 1895(3)  | 59(1)  |
| O(5)  | 306(3)   | 681(1)  | 349(2)   | 52(1)  |
| O(6)  | 323(3)   | 2232(1) | 740(2)   | 40(1)  |
| O(7)  | -826(4)  | -110(2) | 1387(3)  | 65(1)  |
| O(8)  | 456(4)   | 3329(2) | 5868(5)  | 125(2) |
| O(9)  | 223(5)   | 560(2)  | 3948(3)  | 113(2) |
| O(10) | -1222(5) | 4831(2) | 978(4)   | 112(2) |
| O(11) | 2399(4)  | 4755(2) | 2038(3)  | 64(1)  |

---

Table S3. Bond lengths [Å] and angles [°] for [(Eu(H<sub>2</sub>O)<sub>6</sub>)<sub>2</sub>(Pt(CN)<sub>4</sub>)<sub>3</sub>]·4C<sub>11</sub>H<sub>6</sub>N<sub>2</sub>O·4H<sub>2</sub>O.

|              |          |
|--------------|----------|
| Eu(1)-O(6)   | 2.335(3) |
| Eu(1)-O(3)   | 2.373(3) |
| Eu(1)-O(1)   | 2.386(3) |
| Eu(1)-O(5)   | 2.397(3) |
| Eu(1)-O(2)   | 2.411(3) |
| Eu(1)-O(4)   | 2.456(3) |
| Eu(1)-N(5)   | 2.501(4) |
| Eu(1)-N(1)   | 2.513(4) |
| Pt(1)-C(5)   | 1.989(5) |
| Pt(1)-C(5)#1 | 1.989(5) |
| Pt(1)-C(6)#1 | 2.034(8) |
| Pt(1)-C(6)   | 2.034(8) |
| Pt(2)-C(1)   | 1.989(5) |
| Pt(2)-C(2)   | 1.989(6) |
| Pt(2)-C(4)   | 1.994(6) |
| Pt(2)-C(3)   | 2.007(5) |
| C(1)-N(1)    | 1.144(5) |
| C(2)-N(2)    | 1.133(6) |
| C(3)-N(3)    | 1.123(6) |
| C(4)-N(4)    | 1.148(6) |
| C(5)-N(5)    | 1.135(6) |
| C(6)-N(6)    | 1.104(8) |
| C(7)-N(7)    | 1.339(7) |
| C(7)-C(8)    | 1.385(8) |
| C(7)-H(7)    | 0.9300   |
| C(8)-C(9)    | 1.365(9) |
| C(8)-H(8)    | 0.9300   |
| C(9)-C(10)   | 1.366(9) |
| C(9)-H(9)    | 0.9300   |
| C(10)-C(11)  | 1.386(7) |
| C(10)-C(12)  | 1.493(9) |
| C(11)-N(7)   | 1.331(6) |
| C(11)-C(13)  | 1.494(7) |
| C(12)-O(10)  | 1.223(7) |

|             |          |
|-------------|----------|
| C(12)-C(14) | 1.476(8) |
| C(13)-N(8)  | 1.320(6) |
| C(13)-C(14) | 1.393(7) |
| C(14)-C(15) | 1.360(8) |
| C(15)-C(16) | 1.366(8) |
| C(15)-H(15) | 0.9300   |
| C(16)-C(17) | 1.356(7) |
| C(16)-H(16) | 0.9300   |
| C(17)-N(8)  | 1.356(6) |
| C(17)-H(17) | 0.9300   |
| C(18)-N(9)  | 1.343(6) |
| C(18)-C(19) | 1.378(8) |
| C(18)-H(18) | 0.9300   |
| C(19)-C(20) | 1.364(8) |
| C(19)-H(19) | 0.9300   |
| C(20)-C(21) | 1.370(7) |
| C(20)-H(20) | 0.9300   |
| C(21)-C(22) | 1.387(6) |
| C(21)-C(23) | 1.489(7) |
| C(22)-N(9)  | 1.329(6) |
| C(22)-C(24) | 1.477(7) |
| C(23)-O(11) | 1.206(6) |
| C(23)-C(25) | 1.497(7) |
| C(24)-N(10) | 1.328(6) |
| C(24)-C(25) | 1.387(6) |
| C(25)-C(26) | 1.371(7) |
| C(26)-C(27) | 1.385(7) |
| C(26)-H(26) | 0.9300   |
| C(27)-C(28) | 1.371(7) |
| C(27)-H(27) | 0.9300   |
| C(28)-N(10) | 1.346(6) |
| C(28)-H(28) | 0.9300   |
| O(1)-H(1A)  | 0.8502   |
| O(1)-H(1B)  | 0.8494   |
| O(2)-H(2A)  | 0.8501   |
| O(2)-H(2B)  | 0.8495   |

|            |        |
|------------|--------|
| O(3)-H(3A) | 0.8504 |
| O(3)-H(3B) | 0.8508 |
| O(4)-H(4A) | 0.8498 |
| O(4)-H(4B) | 0.8502 |
| O(5)-H(5A) | 0.8500 |
| O(5)-H(5B) | 0.8506 |
| O(6)-H(6A) | 0.8500 |
| O(6)-H(6B) | 0.8505 |
| O(7)-H(7A) | 0.8500 |
| O(7)-H(7B) | 0.8502 |
| O(8)-H(8A) | 0.8503 |
| O(8)-H(8B) | 0.8496 |
| O(9)-H(9A) | 0.8495 |
| O(9)-H(9B) | 0.8579 |

|                 |            |
|-----------------|------------|
| O(6)-Eu(1)-O(3) | 82.14(11)  |
| O(6)-Eu(1)-O(1) | 75.66(11)  |
| O(3)-Eu(1)-O(1) | 72.17(12)  |
| O(6)-Eu(1)-O(5) | 112.59(12) |
| O(3)-Eu(1)-O(5) | 140.45(11) |
| O(1)-Eu(1)-O(5) | 145.61(11) |
| O(6)-Eu(1)-O(2) | 140.81(11) |
| O(3)-Eu(1)-O(2) | 114.74(12) |
| O(1)-Eu(1)-O(2) | 76.71(11)  |
| O(5)-Eu(1)-O(2) | 77.64(12)  |
| O(6)-Eu(1)-O(4) | 73.64(11)  |
| O(3)-Eu(1)-O(4) | 144.79(12) |
| O(1)-Eu(1)-O(4) | 77.25(13)  |
| O(5)-Eu(1)-O(4) | 73.77(12)  |
| O(2)-Eu(1)-O(4) | 73.55(12)  |
| O(6)-Eu(1)-N(5) | 147.47(13) |
| O(3)-Eu(1)-N(5) | 73.07(13)  |
| O(1)-Eu(1)-N(5) | 114.78(14) |
| O(5)-Eu(1)-N(5) | 77.01(14)  |
| O(2)-Eu(1)-N(5) | 70.51(12)  |
| O(4)-Eu(1)-N(5) | 137.49(13) |

|                     |            |
|---------------------|------------|
| O(6)-Eu(1)-N(1)     | 73.64(12)  |
| O(3)-Eu(1)-N(1)     | 78.57(12)  |
| O(1)-Eu(1)-N(1)     | 139.87(12) |
| O(5)-Eu(1)-N(1)     | 71.64(12)  |
| O(2)-Eu(1)-N(1)     | 141.91(12) |
| O(4)-Eu(1)-N(1)     | 117.09(13) |
| N(5)-Eu(1)-N(1)     | 80.94(14)  |
| C(5)-Pt(1)-C(5)#1   | 180.0(4)   |
| C(5)-Pt(1)-C(6)#1   | 90.0(3)    |
| C(5)#1-Pt(1)-C(6)#1 | 90.0(3)    |
| C(5)-Pt(1)-C(6)     | 90.0(3)    |
| C(5)#1-Pt(1)-C(6)   | 90.0(3)    |
| C(6)#1-Pt(1)-C(6)   | 180.0(6)   |
| C(1)-Pt(2)-C(2)     | 91.40(19)  |
| C(1)-Pt(2)-C(4)     | 90.61(19)  |
| C(2)-Pt(2)-C(4)     | 175.9(2)   |
| C(1)-Pt(2)-C(3)     | 178.25(19) |
| C(2)-Pt(2)-C(3)     | 89.6(2)    |
| C(4)-Pt(2)-C(3)     | 88.5(2)    |
| N(1)-C(1)-Pt(2)     | 178.8(5)   |
| N(2)-C(2)-Pt(2)     | 177.8(5)   |
| N(3)-C(3)-Pt(2)     | 178.5(5)   |
| N(4)-C(4)-Pt(2)     | 175.6(5)   |
| N(5)-C(5)-Pt(1)     | 178.2(5)   |
| N(6)-C(6)-Pt(1)     | 178.5(8)   |
| N(7)-C(7)-C(8)      | 124.0(6)   |
| N(7)-C(7)-H(7)      | 118.0      |
| C(8)-C(7)-H(7)      | 118.0      |
| C(9)-C(8)-C(7)      | 120.3(6)   |
| C(9)-C(8)-H(8)      | 119.8      |
| C(7)-C(8)-H(8)      | 119.8      |
| C(8)-C(9)-C(10)     | 116.7(6)   |
| C(8)-C(9)-H(9)      | 121.6      |
| C(10)-C(9)-H(9)     | 121.6      |
| C(9)-C(10)-C(11)    | 119.6(6)   |
| C(9)-C(10)-C(12)    | 132.2(6)   |



|                   |          |
|-------------------|----------|
| C(11)-C(10)-C(12) | 108.2(5) |
| N(7)-C(11)-C(10)  | 124.9(5) |
| N(7)-C(11)-C(13)  | 127.2(5) |
| C(10)-C(11)-C(13) | 107.9(5) |
| O(10)-C(12)-C(14) | 126.4(7) |
| O(10)-C(12)-C(10) | 126.7(7) |
| C(14)-C(12)-C(10) | 107.0(5) |
| N(8)-C(13)-C(14)  | 124.0(5) |
| N(8)-C(13)-C(11)  | 126.5(5) |
| C(14)-C(13)-C(11) | 109.5(5) |
| C(15)-C(14)-C(13) | 119.2(6) |
| C(15)-C(14)-C(12) | 133.4(6) |
| C(13)-C(14)-C(12) | 107.4(5) |
| C(14)-C(15)-C(16) | 117.6(6) |
| C(14)-C(15)-H(15) | 121.2    |
| C(16)-C(15)-H(15) | 121.2    |
| C(17)-C(16)-C(15) | 120.2(6) |
| C(17)-C(16)-H(16) | 119.9    |
| C(15)-C(16)-H(16) | 119.9    |
| N(8)-C(17)-C(16)  | 123.7(6) |
| N(8)-C(17)-H(17)  | 118.1    |
| C(16)-C(17)-H(17) | 118.1    |
| N(9)-C(18)-C(19)  | 124.1(5) |
| N(9)-C(18)-H(18)  | 118.0    |
| C(19)-C(18)-H(18) | 118.0    |
| C(20)-C(19)-C(18) | 120.5(6) |
| C(20)-C(19)-H(19) | 119.7    |
| C(18)-C(19)-H(19) | 119.7    |
| C(19)-C(20)-C(21) | 116.4(5) |
| C(19)-C(20)-H(20) | 121.8    |
| C(21)-C(20)-H(20) | 121.8    |
| C(20)-C(21)-C(22) | 119.9(5) |
| C(20)-C(21)-C(23) | 131.2(5) |
| C(22)-C(21)-C(23) | 108.9(4) |
| N(9)-C(22)-C(21)  | 124.4(5) |
| N(9)-C(22)-C(24)  | 126.5(4) |

|                   |          |
|-------------------|----------|
| C(21)-C(22)-C(24) | 109.1(4) |
| O(11)-C(23)-C(21) | 128.1(5) |
| O(11)-C(23)-C(25) | 127.2(5) |
| C(21)-C(23)-C(25) | 104.7(4) |
| N(10)-C(24)-C(25) | 124.3(5) |
| N(10)-C(24)-C(22) | 127.5(5) |
| C(25)-C(24)-C(22) | 108.2(4) |
| C(26)-C(25)-C(24) | 120.1(5) |
| C(26)-C(25)-C(23) | 130.7(5) |
| C(24)-C(25)-C(23) | 109.2(4) |
| C(25)-C(26)-C(27) | 116.1(5) |
| C(25)-C(26)-H(26) | 122.0    |
| C(27)-C(26)-H(26) | 122.0    |
| C(28)-C(27)-C(26) | 120.4(5) |
| C(28)-C(27)-H(27) | 119.8    |
| C(26)-C(27)-H(27) | 119.8    |
| N(10)-C(28)-C(27) | 123.9(5) |
| N(10)-C(28)-H(28) | 118.0    |
| C(27)-C(28)-H(28) | 118.0    |
| C(1)-N(1)-Eu(1)   | 177.7(4) |
| C(5)-N(5)-Eu(1)   | 173.8(5) |
| C(11)-N(7)-C(7)   | 114.4(5) |
| C(13)-N(8)-C(17)  | 115.3(5) |
| C(22)-N(9)-C(18)  | 114.6(5) |
| C(24)-N(10)-C(28) | 115.1(5) |
| Eu(1)-O(1)-H(1A)  | 128.1    |
| Eu(1)-O(1)-H(1B)  | 123.4    |
| H(1A)-O(1)-H(1B)  | 108.6    |
| Eu(1)-O(2)-H(2A)  | 123.5    |
| Eu(1)-O(2)-H(2B)  | 121.1    |
| H(2A)-O(2)-H(2B)  | 112.0    |
| Eu(1)-O(3)-H(3A)  | 131.1    |
| Eu(1)-O(3)-H(3B)  | 127.8    |
| H(3A)-O(3)-H(3B)  | 101.1    |
| Eu(1)-O(4)-H(4A)  | 120.9    |
| Eu(1)-O(4)-H(4B)  | 122.2    |

|                  |       |
|------------------|-------|
| H(4A)-O(4)-H(4B) | 114.7 |
| Eu(1)-O(5)-H(5A) | 124.0 |
| Eu(1)-O(5)-H(5B) | 127.4 |
| H(5A)-O(5)-H(5B) | 100.9 |
| Eu(1)-O(6)-H(6A) | 123.1 |
| Eu(1)-O(6)-H(6B) | 121.5 |
| H(6A)-O(6)-H(6B) | 110.4 |
| H(7A)-O(7)-H(7B) | 107.2 |
| H(8A)-O(8)-H(8B) | 107.8 |
| H(9A)-O(9)-H(9B) | 94.5  |

---

Symmetry transformations used to generate equivalent atoms:

#1 -x+1,-y,-z

Table S4. Anisotropic displacement parameters ( $\text{\AA}^2 \times 10^3$ ) for  $[(\text{Eu}(\text{H}_2\text{O})_6)_2(\text{Pt}(\text{CN})_4)_3] \cdot 4\text{C}_{11}\text{H}_6\text{N}_2\text{O} \cdot 4\text{H}_2\text{O}$ .  
The anisotropic displacement factor exponent takes the form:  $-2\pi^2 [h^2 a^{*2} U^{11} + \dots + 2 h k a^* b^* U^{12}]$

|       | $U^{11}$ | $U^{22}$ | $U^{33}$ | $U^{23}$ | $U^{13}$ | $U^{12}$ |
|-------|----------|----------|----------|----------|----------|----------|
| Eu(1) | 36(1)    | 21(1)    | 24(1)    | 1(1)     | 4(1)     | 5(1)     |
| Pt(1) | 78(1)    | 43(1)    | 59(1)    | 21(1)    | 39(1)    | 37(1)    |
| Pt(2) | 34(1)    | 46(1)    | 23(1)    | 3(1)     | 2(1)     | -4(1)    |
| C(1)  | 35(3)    | 34(3)    | 28(3)    | 0(2)     | -3(2)    | -3(2)    |
| C(2)  | 39(3)    | 53(4)    | 35(3)    | 0(3)     | -3(3)    | 1(3)     |
| C(3)  | 41(3)    | 65(4)    | 27(3)    | 4(3)     | 0(3)     | -23(3)   |
| C(4)  | 38(3)    | 70(4)    | 30(3)    | 6(3)     | 2(3)     | -2(3)    |
| C(5)  | 68(4)    | 37(3)    | 55(4)    | 16(3)    | 25(3)    | 14(3)    |
| C(6)  | 97(6)    | 47(5)    | 53(5)    | 6(3)     | 23(4)    | 22(4)    |
| C(7)  | 69(4)    | 61(4)    | 51(4)    | 8(3)     | -10(3)   | -4(3)    |
| C(8)  | 86(5)    | 79(5)    | 69(5)    | 27(4)    | -35(4)   | -16(4)   |
| C(9)  | 96(6)    | 46(5)    | 106(6)   | 18(4)    | -47(5)   | -14(4)   |
| C(10) | 57(4)    | 45(4)    | 69(5)    | 5(3)     | -27(3)   | -1(3)    |
| C(11) | 29(3)    | 36(3)    | 60(4)    | 8(3)     | -10(3)   | -1(2)    |
| C(12) | 71(5)    | 36(4)    | 112(6)   | -9(4)    | -37(4)   | 8(3)     |
| C(13) | 25(3)    | 36(3)    | 51(3)    | -8(3)    | -2(2)    | 0(2)     |
| C(14) | 39(3)    | 40(4)    | 70(4)    | -13(3)   | -9(3)    | 7(3)     |
| C(15) | 65(4)    | 66(5)    | 80(5)    | -39(4)   | -6(4)    | 10(4)    |
| C(16) | 58(4)    | 78(5)    | 52(4)    | -23(4)   | -4(3)    | 7(4)     |
| C(17) | 47(3)    | 57(4)    | 50(4)    | -5(3)    | 10(3)    | -3(3)    |
| C(18) | 56(4)    | 72(5)    | 41(4)    | -10(3)   | 7(3)     | -5(3)    |
| C(19) | 64(4)    | 79(5)    | 44(4)    | 17(4)    | 1(3)     | -9(4)    |
| C(20) | 58(4)    | 44(4)    | 65(4)    | 14(3)    | -1(3)    | -3(3)    |
| C(21) | 40(3)    | 33(3)    | 43(3)    | 2(2)     | -1(3)    | -3(2)    |
| C(22) | 30(3)    | 32(3)    | 40(3)    | 1(2)     | 0(2)     | -7(2)    |
| C(23) | 37(3)    | 33(3)    | 62(4)    | -5(3)    | 0(3)     | -2(3)    |
| C(24) | 27(3)    | 35(3)    | 45(3)    | 3(3)     | -4(2)    | -4(2)    |
| C(25) | 36(3)    | 35(3)    | 43(3)    | -7(3)    | -6(3)    | -3(2)    |
| C(26) | 52(4)    | 43(4)    | 57(4)    | -17(3)   | -2(3)    | -5(3)    |
| C(27) | 58(4)    | 67(5)    | 37(3)    | -3(3)    | -8(3)    | -6(3)    |
| C(28) | 49(4)    | 52(4)    | 52(4)    | 8(3)     | -11(3)   | -6(3)    |

|       |        |        |        |        |        |        |
|-------|--------|--------|--------|--------|--------|--------|
| N(1)  | 51(3)  | 42(3)  | 29(3)  | 0(2)   | 2(2)   | -3(2)  |
| N(2)  | 56(3)  | 52(3)  | 60(3)  | 1(3)   | 2(3)   | -4(3)  |
| N(3)  | 125(5) | 105(5) | 25(3)  | 7(3)   | 3(3)   | -34(4) |
| N(4)  | 75(4)  | 57(4)  | 75(4)  | -6(3)  | -1(3)  | -19(3) |
| N(5)  | 59(3)  | 30(3)  | 65(3)  | 4(2)   | 24(3)  | 20(2)  |
| N(6)  | 122(6) | 65(5)  | 91(5)  | -1(4)  | 17(4)  | 24(4)  |
| N(7)  | 49(3)  | 41(3)  | 44(3)  | 4(2)   | -1(2)  | 0(2)   |
| N(8)  | 33(2)  | 37(3)  | 48(3)  | -1(2)  | 2(2)   | 3(2)   |
| N(9)  | 49(3)  | 34(3)  | 43(3)  | -7(2)  | 0(2)   | 0(2)   |
| N(10) | 45(3)  | 37(3)  | 40(3)  | -1(2)  | -5(2)  | 0(2)   |
| O(1)  | 88(3)  | 38(2)  | 22(2)  | -2(2)  | 2(2)   | -12(2) |
| O(2)  | 67(2)  | 34(2)  | 42(2)  | 14(2)  | 14(2)  | 21(2)  |
| O(3)  | 41(2)  | 31(2)  | 66(2)  | -2(2)  | 5(2)   | -2(2)  |
| O(4)  | 55(2)  | 31(2)  | 93(3)  | 6(2)   | 40(2)  | 7(2)   |
| O(5)  | 73(3)  | 40(2)  | 44(2)  | -7(2)  | 10(2)  | -23(2) |
| O(6)  | 57(2)  | 34(2)  | 29(2)  | -3(2)  | -1(2)  | 15(2)  |
| O(7)  | 83(3)  | 59(3)  | 52(2)  | 0(2)   | 7(2)   | -14(2) |
| O(8)  | 50(3)  | 128(5) | 197(6) | 94(4)  | -11(3) | -7(3)  |
| O(9)  | 174(5) | 84(4)  | 85(3)  | -25(3) | 70(4)  | -44(4) |
| O(10) | 140(5) | 43(3)  | 151(5) | -8(3)  | -37(4) | 26(3)  |
| O(11) | 75(3)  | 31(2)  | 87(3)  | -6(2)  | -2(2)  | 0(2)   |

---

Table S5. Hydrogen coordinates ( $\times 10^4$ ) and isotropic displacement parameters ( $\text{\AA}^2 \times 10^{-3}$ ) for  $[(\text{Eu}(\text{H}_2\text{O})_6)_2(\text{Pt}(\text{CN})_4)_3] \cdot 4\text{C}_{11}\text{H}_6\text{N}_2\text{O} \cdot 4\text{H}_2\text{O}$ .

|       | x     | y    | z     | U(eq) |
|-------|-------|------|-------|-------|
| H(7)  | -160  | 3031 | -1842 | 72    |
| H(8)  | -676  | 3867 | -2367 | 94    |
| H(9)  | -1025 | 4532 | -1209 | 100   |
| H(15) | -944  | 4377 | 3073  | 85    |
| H(16) | -466  | 3646 | 4055  | 75    |
| H(17) | -17   | 2860 | 3335  | 62    |
| H(18) | 2862  | 2945 | -868  | 67    |
| H(19) | 2551  | 3803 | -1351 | 75    |
| H(20) | 2397  | 4469 | -164  | 67    |
| H(26) | 2756  | 4282 | 4093  | 61    |
| H(27) | 3004  | 3508 | 5049  | 65    |
| H(28) | 3056  | 2701 | 4289  | 61    |
| H(1A) | 1356  | 1897 | 3143  | 74    |
| H(1B) | 2090  | 2226 | 2591  | 74    |
| H(2A) | 1956  | 484  | 2310  | 71    |
| H(2B) | 1049  | 749  | 2849  | 71    |
| H(3A) | 3150  | 2305 | 764   | 69    |
| H(3B) | 3823  | 1875 | 860   | 69    |
| H(4A) | -1057 | 1652 | 2020  | 88    |
| H(4B) | -1053 | 1085 | 1915  | 88    |
| H(5A) | 74    | 412  | 680   | 78    |
| H(5B) | 431   | 540  | -219  | 78    |
| H(6A) | 304   | 2377 | 164   | 60    |
| H(6B) | 221   | 2464 | 1194  | 60    |
| H(7A) | -409  | -253 | 1861  | 97    |
| H(7B) | -1312 | 109  | 1652  | 97    |
| H(8A) | 862   | 3059 | 6069  | 188   |
| H(8B) | 933   | 3595 | 5878  | 188   |
| H(9A) | 27    | 240  | 3821  | 170   |
| H(9B) | 233   | 518  | 4586  | 170   |

Figure S1.

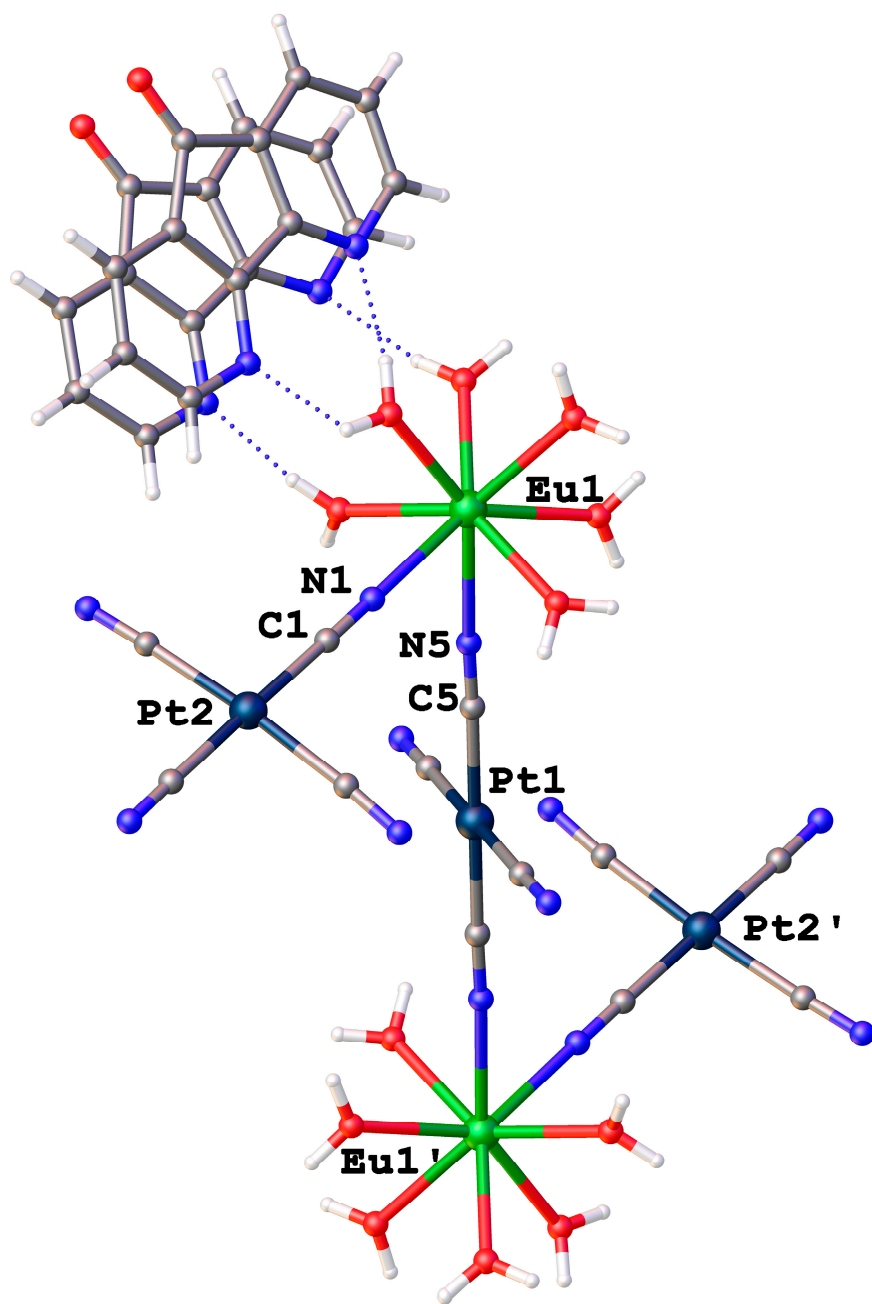

Figure S2.

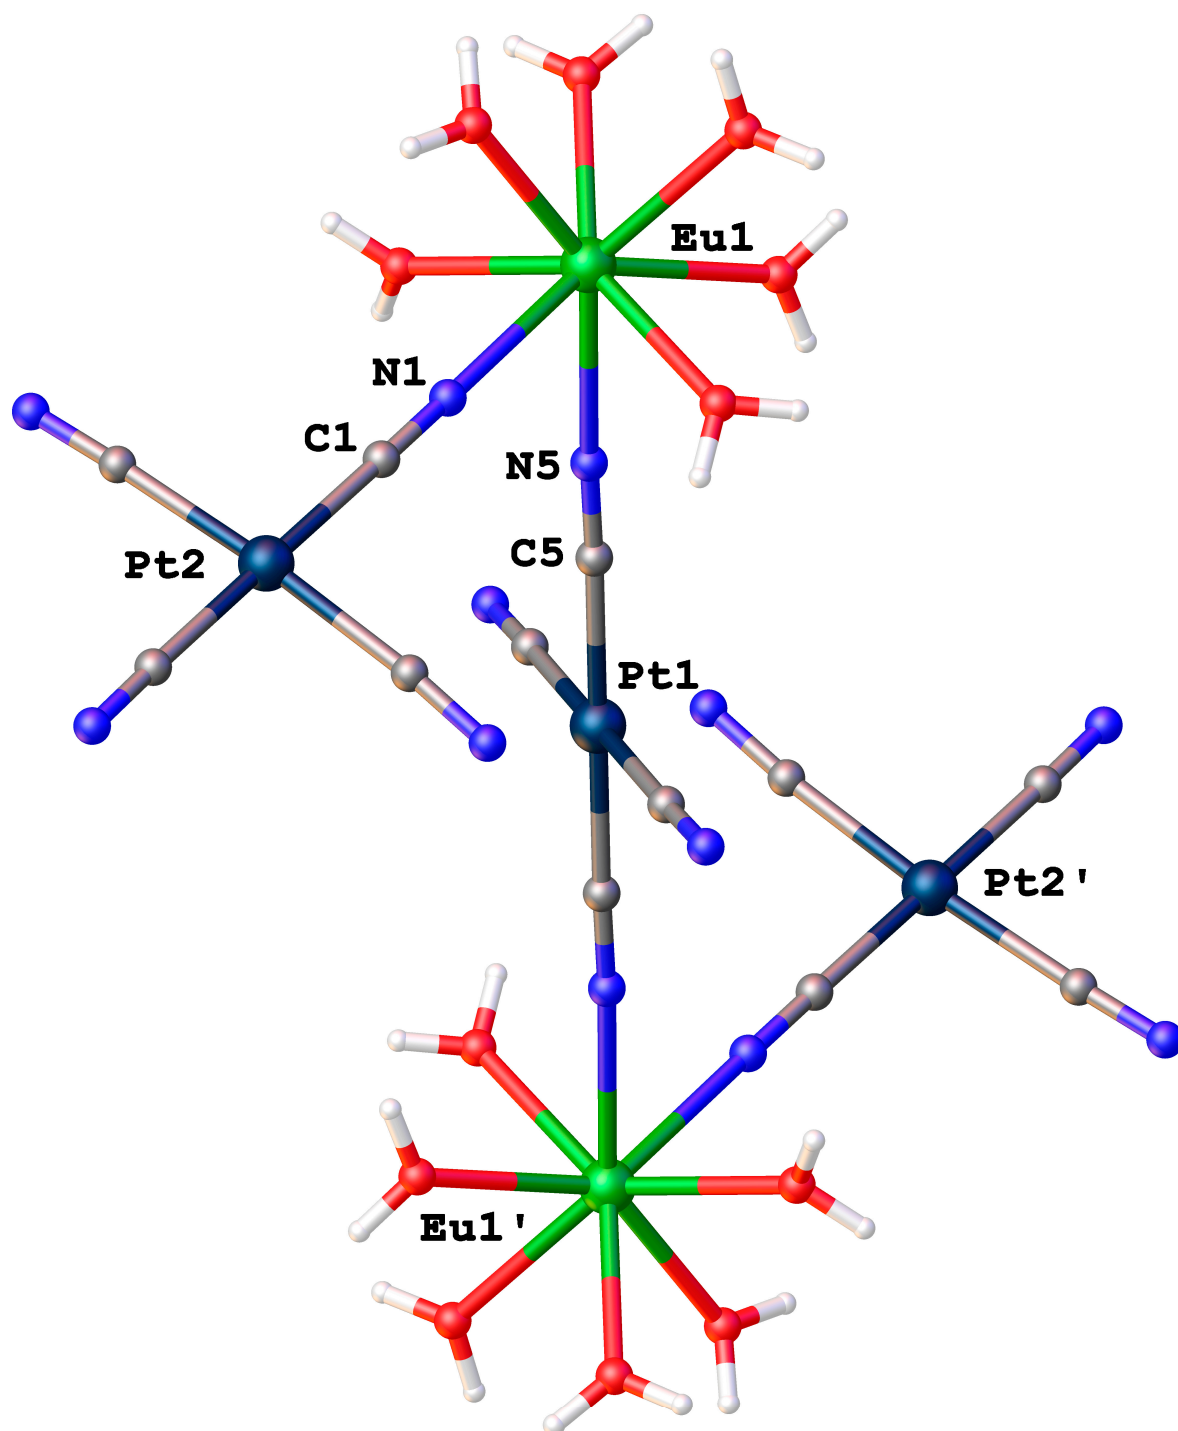

Supplement: s1 [file s1]
